# Supplementary material for: Synergistic effects of soybean oligosaccharides and Chlorella pyrenoidosa on water quality and microbial community structure in biofloc system
Source: Research Square preprint supplement (doi:10.21203/rs.3.rs-6527949/v1), 2025-05-06
Supplement: Supplementary file 1 [file 4ad0432edbd0ce5eebd7b8b1.docx]

| Groups | Day 1 | Day 3 | Day 5 | Day 7 | Day 9 |
| --- | --- | --- | --- | --- | --- |
| CON | 0.10±0.05 | 0.12±0.05 | 0.11±0.03 | 0.03±0.00 | 0.08±0.00 |
| GLU | 0.17±0.07 | 1.70±0.21* | 0.24±0.06* | 0.02±0.00* | 0.08±0.00 |
| SBOS | 0.21±0.08* | 1.86±0.36* | 0.17±0.02* | 0.03±0.01 | 0.08±0.00 |
| CP | 0.15±0.06 | 1.66±0.32* | 0.17±0.08 | 0.03±0.00 | 0.10±0.01* |
| CS | 0.19±0.12 | 1.58±0.35* | 0.12±0.04 | 0.03±0.01 | 0.09±0.01* |

**Table S1** The variations in Ammonia Nitrogen in each experimental group compared with the control group

Notes: CON: control group without additives; GLU: glucose added; SBOS: 97.5% glucose and 2.5% soybean oligosaccharide added; CP: glucose and *Chlorella pyrenoidosa* added; CS: 97.5% glucose, 2.5% soybean oligosaccharide, and *Chlorella pyrenoidosa* added. Data are presented as means ± SD, n = 5. * indicates a significant difference compared to the control group (*P*<0.05)

**Table S2** The variations in Ammonia Nitrogen in each experimental group compared with the control group

| Groups | Day 1 | Day 3 | Day 5 | Day 7 | Day 9 |
| --- | --- | --- | --- | --- | --- |
| CON | 0.20±0.07 | 0.09±0.01 | 0.09±0.01 | 0.05±0.02 | 0.03±0.01 |
| GLU | 0.59±0.20* | 0.15±0.07 | 1.18±0.24* | 0.17±0.05* | 0.05±0.03 |
| SBOS | 0.52±0.31 | 0.16±0.03* | 1.56±0.18* | 0.29±0.07* | 0.06±0.03 |
| CP | 0.55±0.39 | 0.34±0.05* | 0.77±0.24* | 0.17±0.04* | 0.07±0.02* |
| CS | 0.44±0.45 | 0.25±0.06* | 0.63±0.34* | 0.15±0.05* | 0.06±0.02 |

Notes: CON: control group without additives; GLU: glucose added; SBOS: 97.5% glucose and 2.5% soybean oligosaccharide added; CP: glucose and *Chlorella pyrenoidosa* added; CS: 97.5% glucose, 2.5% soybean oligosaccharide, and *Chlorella pyrenoidosa* added. Data are presented as means ± SD, n = 5. * indicates a significant difference compared to the control group (*P*<0.05)

**Table S3** The variations in Nitrate Nitrogen in each experimental group compared with the control group

| Groups | Day 1 | Day 3 | Day 5 | Day 7 | Day 9 |
| --- | --- | --- | --- | --- | --- |
| CON | 10.30±0.04 | 11.21±0.30 | 10.65±0.66 | 11.81±0.24 | 10.53±0.43 |
| GLU | 1.43±0.10* | 0.35±0.06* | 2.84±0.72* | 5.37±0.81* | 6.03±0.44* |
| SBOS | 1.47±0.05* | 0.28±0.06* | 2.13±0.42* | 4.92±0.73* | 5.66±0.82* |
| CP | 0.58±0.06* | 0.53±0.24* | 3.68±0.95* | 5.60±0.96* | 5.89±0.90* |
| CS | 0.26±0.04* | 0.46±0.18* | 3.19±1.03* | 5.03±0.60* | 5.70±0.66* |

Notes: CON: control group without additives; GLU: glucose added; SBOS: 97.5% glucose and 2.5% soybean oligosaccharide added; CP: glucose and *Chlorella pyrenoidosa* added; CS: 97.5% glucose, 2.5% soybean oligosaccharide, and *Chlorella pyrenoidosa* added. Data are presented as means ± SD, n = 5. * indicates a significant difference compared to the control group (*P*<0.05)

**Table S4** The variations in Total Nitrogen in each experimental group compared with the control group

| Groups | Day 1 | Day 3 | Day 5 | Day 7 | Day 9 |
| --- | --- | --- | --- | --- | --- |
| CON | 9.19±0.03 | 10.79±0.94 | 8.58±0.68 | 12.22±1.71 | 11.76±0.18 |
| GLU | 5.07±0.69* | 3.30±0.37* | 4.60±0.52* | 7.15±0.86* | 8.43±0.30* |
| SBOS | 3.63±1.17* | 3.41±0.47* | 4.24±0.33* | 8.71±1.1* | 8.18±0.80* |
| CP | 3.71±0.51* | 3.29±0.60* | 4.53±0.46* | 9.40±1.15* | 8.08±1.05* |
| CS | 3.41±0.57* | 3.05±0.21* | 4.53±0.32* | 8.59±0.88* | 8.18±0.95* |

Notes: CON: control group without additives; GLU: glucose added; SBOS: 97.5% glucose and 2.5% soybean oligosaccharide added; CP: glucose and *Chlorella pyrenoidosa* added; CS: 97.5% glucose, 2.5% soybean oligosaccharide, and *Chlorella pyrenoidosa* added. Data are presented as means ± SD, n = 5. * indicates a significant difference compared to the control group (*P*<0.05)

**Table S5** The variations in Floc Volume in each experimental group compared with the control group

| Groups | Day 1 | Day 3 | Day 5 | Day 7 | Day 9 |
| --- | --- | --- | --- | --- | --- |
| CON | 0.00±0.00 | 0.10±0.00 | 0.10±0.00 | 0.10±0.00 | 0.10±0.00 |
| GLU | 0.00±0.00 | 35.00±12.37* | 8.40±2.88* | 3.26±0.73* | 2.38±0.19* |
| SBOS | 0.00±0.00 | 79.00±11.92* | 10.80±1.79* | 3.13±0.38* | 3.20±0.39* |
| CP | 0.00±0.00 | 44.80±3.42* | 7.76±3.27* | 3.75±0.48* | 1.69±0.19* |
| CS | 0.00±0.00 | 47.40±11.61* | 8.00±4.69* | 3.30±0.67* | 2.85±0.23* |

Notes: CON: control group without additives; GLU: glucose added; SBOS: 97.5% glucose and 2.5% soybean oligosaccharide added; CP: glucose and *Chlorella pyrenoidosa* added; CS: 97.5% glucose, 2.5% soybean oligosaccharide, and *Chlorella pyrenoidosa* added. Data are presented as means ± SD, n = 5. * indicates a significant difference compared to the control group (*P*<0.05)

**Table S6** The variations in Turbidity in each experimental group compared with the control group

| Groups | Day 1 | Day 3 | Day 5 | Day 7 | Day 9 |
| --- | --- | --- | --- | --- | --- |
| CON | 44.78±13.48 | 33.56±8.03 | 38.40±1.49 | 18.78±2.98 | 16.92±1.64 |
| GLU | 45.74±6.38 | 34.10±13.25 | 9.65±4.00* | 4.35±0.87* | 5.82±1.60* |
| SBOS | 67.84±7.99* | 35.64±17.98 | 9.02±1.77* | 3.95±1.53* | 5.71±1.54* |
| CP | 54.82±9.92 | 37.17±21.28 | 8.95±1.71* | 3.51±1.18* | 4.48±0.41* |
| CS | 55.40±9.18 | 27.99±3.88 | 5.47±2.07* | 3.67±1.98* | 7.22±2.14* |

Notes: CON: control group without additives; GLU: glucose added; SBOS: 97.5% glucose and 2.5% soybean oligosaccharide added; CP: glucose and *Chlorella pyrenoidosa* added; CS: 97.5% glucose, 2.5% soybean oligosaccharide, and *Chlorella pyrenoidosa* added. Data are presented as means ± SD, n = 5. * indicates a significant difference compared to the control group (*P*<0.05)
